# Supplementary material for: AI4AVP: an antiviral peptides predictor in deep learning approach with generative adversarial network data augmentation
Source: PubMed Central journal article supplement (PMC9710571; doi:10.1093/bioadv/vbac080), 2022-10-26
Supplement: vbac080_supplementary_data.pdf [file vbac080_supplementary_data.pdf]

**Supplementary Table 1.** List of the predictors compared with AI4AVP in this study.

| Predictors                 | Machine learning           | Application type | Website                                                                                   |
|----------------------------|----------------------------|------------------|-------------------------------------------------------------------------------------------|
| <b>AVPpred (1)</b>         | Support Vector Machine     | Web-server       | <a href="http://crdd.osdd.net/servers/avppred/">http://crdd.osdd.net/servers/avppred/</a> |
| <b>AntiVPP1.0 (2)</b>      | Random Forest              | Source code      | <a href="https://github.com/bio-coding/AntiVPP">https://github.com/bio-coding/AntiVPP</a> |
| <b>Meta-iAVP (3)</b>       | Ensemble Model             | Web-server       | <a href="http://codes.bio/meta-iavp/">http://codes.bio/meta-iavp/</a>                     |
| <b>FIRM-AVP (4)</b>        | Support Vector Machine     | Web-server       | <a href="https://msc-viz.emsl.pnnl.gov/AVPR/">https://msc-viz.emsl.pnnl.gov/AVPR/</a>     |
| <b>AI4AVP (this study)</b> | <b>Deep learning (CNN)</b> | Web-server       | <a href="https://axp.iis.sinica.edu.tw/AI4AVP/">https://axp.iis.sinica.edu.tw/AI4AVP/</a> |

**Supplementary Table 2.** List of databases we collected data from.

| Database               | Label    | Website                                                                                                                           |
|------------------------|----------|-----------------------------------------------------------------------------------------------------------------------------------|
| <b>APD3 (5)</b>        | Positive | <a href="https://wangapd3.com/main.php">https://wangapd3.com/main.php</a>                                                         |
| <b>DRAMP (6)</b>       | Positive | <a href="http://dramp.cpu-bioinfor.org/">http://dramp.cpu-bioinfor.org/</a>                                                       |
| <b>YADAMP (7)</b>      | Positive | <a href="https://webs.iiitd.edu.in/raghava/satpdb/catalogs/yadamp/">https://webs.iiitd.edu.in/raghava/satpdb/catalogs/yadamp/</a> |
| <b>DBAASP (8)</b>      | Positive | <a href="https://dbaasp.org/home">https://dbaasp.org/home</a>                                                                     |
| <b>CAMP (9)</b>        | Positive | <a href="http://www.camp3.bicnirrh.res.in/index.php">http://www.camp3.bicnirrh.res.in/index.php</a>                               |
| <b>AVPdb (10)</b>      | Positive | <a href="http://crdd.osdd.net/servers/avpdb/">http://crdd.osdd.net/servers/avpdb/</a>                                             |
| <b>Swiss-Prot (11)</b> | Negative | <a href="https://www.uniprot.org/">https://www.uniprot.org/</a>                                                                   |

**Supplementary Table3.** 10-fold cross-validation results by AVP\_training and AVP+GAN\_training, respectively. Each fit is performed on a training set consisting of 90% of total training set at random, with the remaining 10% used as testing set for validation.

| Training Set     | Encoding method      | Algorithm** | Accuracy           | Precision          | Sensitivity        | Specificity        | MCC                |
|------------------|----------------------|-------------|--------------------|--------------------|--------------------|--------------------|--------------------|
| AVP_training     | <b>PC6 encoding</b>  | <b>CNN</b>  | <b>0.886±0.012</b> | <b>0.876±0.030</b> | <b>0.901±0.024</b> | <b>0.870±0.042</b> | <b>0.773±0.022</b> |
|                  | PC6 encoding         | RF          | 0.861±0.020        | 0.837±0.022        | 0.896±0.030        | 0.826±0.018        | 0.724±0.040        |
|                  | PC6 encoding         | SVM         | 0.842±0.018        | 0.811±0.035        | 0.889±0.014        | 0.795±0.027        | 0.686±0.034        |
|                  | descriptor encoding* | CNN         | 0.861±0.018        | 0.857±0.021        | 0.866±0.024        | 0.856±0.021        | 0.722±0.036        |
| AVP+GAN_training | <b>PC6 encoding</b>  | <b>CNN</b>  | <b>0.939±0.005</b> | <b>0.935±0.014</b> | <b>0.944±0.011</b> | <b>0.934±0.015</b> | <b>0.878±0.009</b> |
|                  | PC6 encoding         | RF          | 0.905±0.005        | 0.861±0.008        | 0.966±0.004        | 0.844±0.007        | 0.817±0.008        |
|                  | PC6 encoding         | SVM         | 0.934±0.004        | 0.919±0.007        | 0.952±0.005        | 0.916±0.007        | 0.868±0.008        |
|                  | descriptor encoding* | CNN         | 0.875±0.007        | 0.869±0.008        | 0.883±0.007        | 0.866±0.011        | 0.750±0.013        |

**Supplementary Table 4.** The comparison of AVP predictors, trained with 2012\_training, evaluated the performance using AVP\_testing (293 positives, 293 negatives). There is no any overlap between AVP\_testing and 2012\_training.

| Training dataset      | Predictors                | Accuracy    | Precision   | Sensitivity | Specificity | MCC   |
|-----------------------|---------------------------|-------------|-------------|-------------|-------------|-------|
| <b>2012_training*</b> | AVPpred (1)               | 0.55        | <b>0.61</b> | 0.29        | <b>0.82</b> | 0.12  |
|                       | AntiVPP1.0 (2)            | <b>0.56</b> | 0.58        | 0.44        | 0.68        | 0.13  |
|                       | Meta-iAVP (3)             | 0.55        | 0.56        | <b>0.49</b> | 0.61        | -0.04 |
|                       | FIRM-AVP (4)              | 0.48        | 0.48        | 0.47        | 0.49        | 0.10  |
|                       | AI4AVP **<br>(this study) | 0.55        | 0.56        | 0.46        | 0.64        | 0.11  |

Remarks:

\* **AVP\_testing**: 293 positives + 293 negatives, selected from a clean AVP collection in this study (AVP\_fullset, 2,934 positives + 2,934 negatives).

\*: 2012\_training were collected by Thakur's work (1) for the AVPpred with 506 AVPs and 506 non-AVP.

\*\* : we trained the same CNN model of AI4AVP with the 2012\_training set.

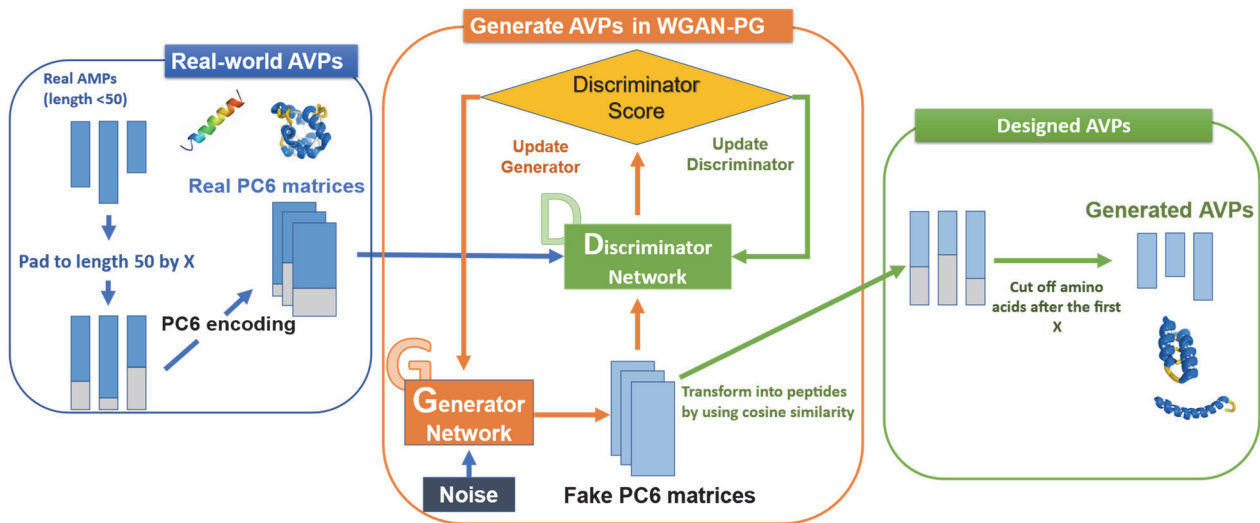

**Supplementary Figure 1.** The proposed GAN model for generating AVPs. Two neural networks, the *generator*, and the *discriminator*, are wrapped to form a backpropagation relationship. Briefly, the *generator* takes noise as its input to create AVP-like sequences (generated AVPs). The *discriminator* is trained to distinguish real AVPs from generated AVPs. The training aims to increase the generator's success rate by producing AVP-like peptides that fool the *discriminator*.

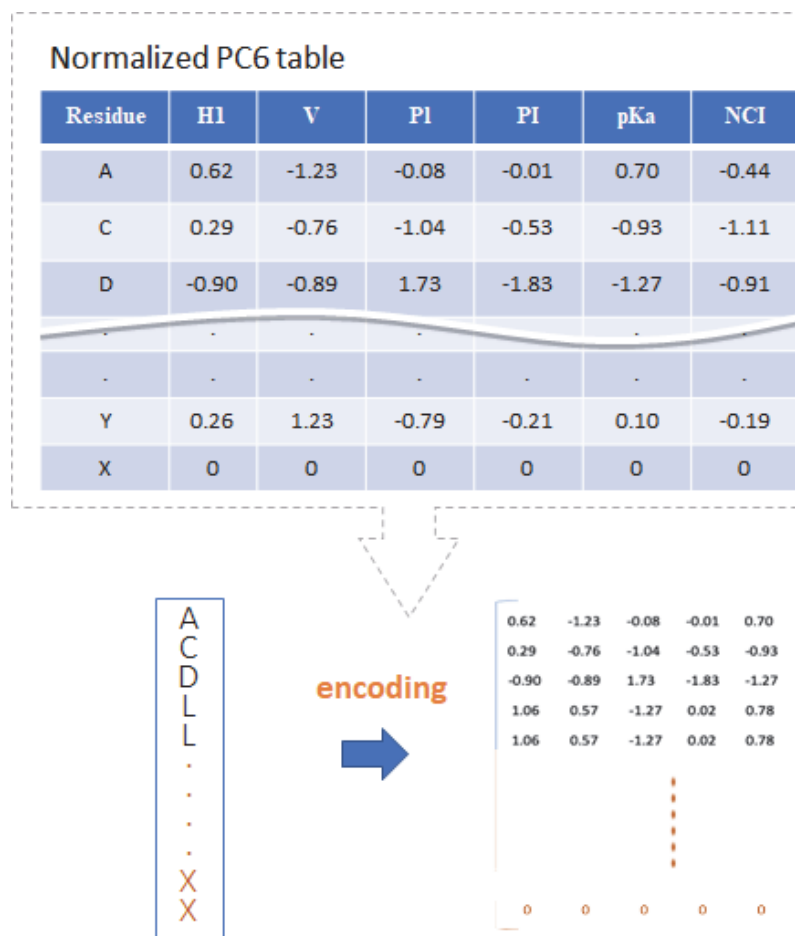

**Supplementary Figure 2.** The protein-encoding method PC6 is based on the physicochemical properties of each residue shown in the sequence. The normalized score of Hydrophobicity (H1), the volume of side chains (V), polarity (PI), pH at the isoelectric point (pI), the dissociation constant for the -COOH group (pKa), and the net charge index of the side chain (NCI) are selected to present features of each residue component. The input peptide is padded with X if the length is shorter than 50 and is converted to a 50x6 matrix.

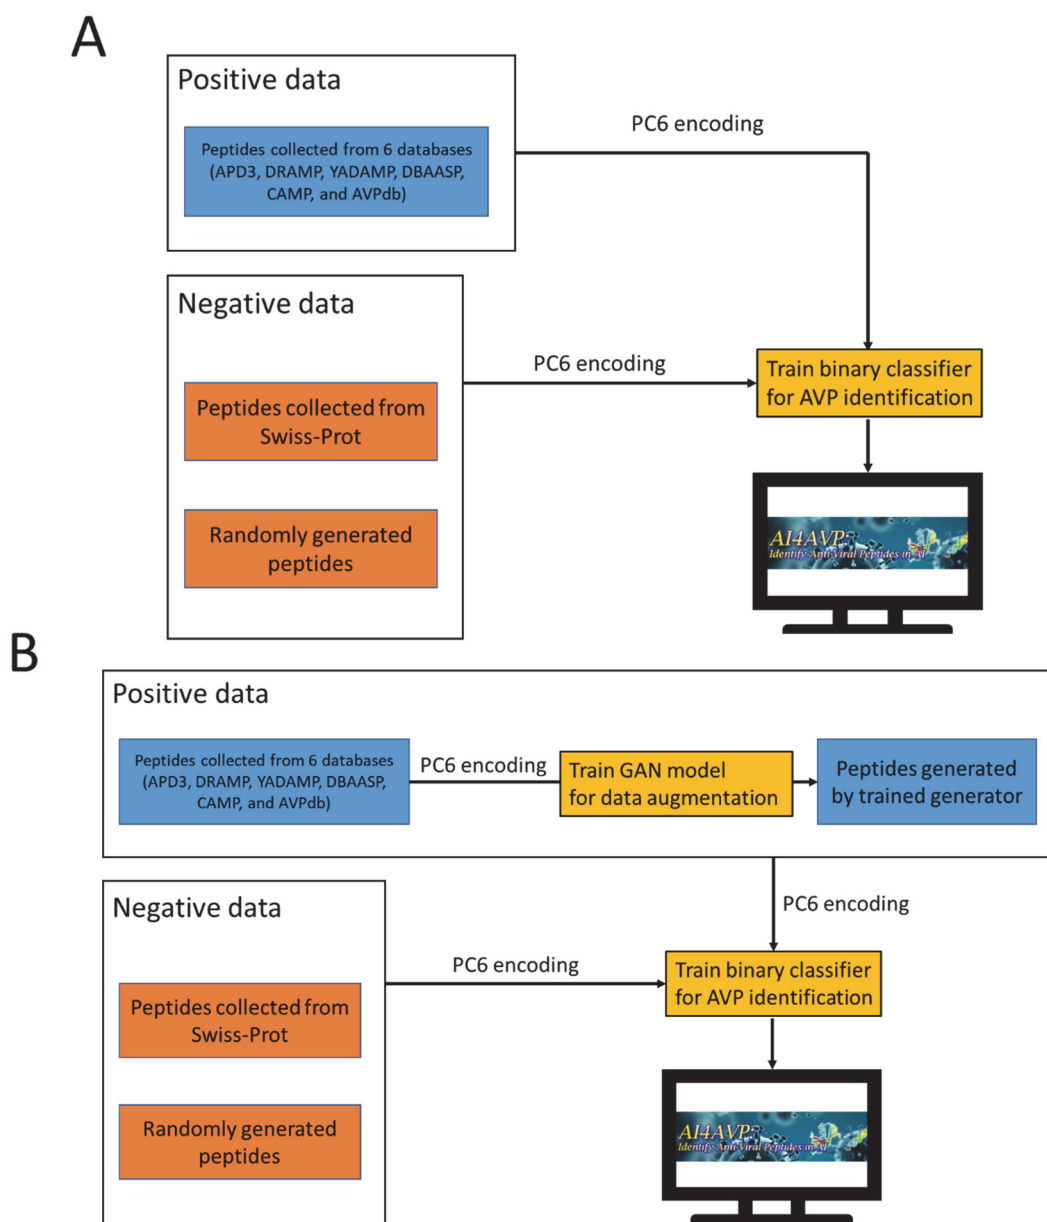

**Supplementary Figure 3.** The pipeline of AI4AVP development.

(A) The model trained on a positive dataset, AVP\_training, consisting of real AVPs collected from AVP databases and an equal amount of non-AVP sequences. To make a balanced input in model training, the number of non-AVPs is limited. (B) The model was trained using AVP+GAN\_training. We applied GAN for data augmentation; in this way, the positives consist of real AVPs plus GAN-generated AVPs, and almost all sequences in the negative data can be used for model training.

## References

1. Thakur N, Qureshi A, Kumar M. 2012. AVPpred: collection and prediction of highly effective antiviral peptides. *Nucleic acids research* 40:W199-W204.
2. Lissabet JFB, Belén LH, Farias JG. 2019. AntiVPP 1.0: A portable tool for prediction of antiviral peptides. *Computers in biology and medicine* 107:127-130.
3. Schaduangrat N, Nantasenamat C, Prachayasittikul V, Shoombuatong W. 2019. Meta-iAVP: a sequence-based meta-predictor for improving the prediction of antiviral peptides using effective feature representation. *International journal of molecular sciences* 20:5743.
4. Chowdhury AS, Reehl SM, Kehn-Hall K, Bishop B, Webb-Robertson B-JM. 2020. Better understanding and prediction of antiviral peptides through primary and secondary structure feature importance. *Scientific reports* 10:1-8.
5. Li X, Wang Z, Wang G. 2015. APD3: the antimicrobial peptide database as a tool for research and education. *Nucleic Acids Research* 44:D1087-D1093.
6. Kang X, Dong F, Shi C, Liu S, Sun J, Chen J, Li H, Xu H, Lao X, Zheng H. 2019. DRAMP 2.0, an updated data repository of antimicrobial peptides. *Scientific Data* 6:148.
7. Piotto SP, Sessa L, Concilio S, Iannelli P. 2012. YADAMP: yet another database of antimicrobial peptides. *International journal of antimicrobial agents* 39:346-351.
8. Pirtskhalava M, Amstrong AA, Grigolava M, Chubinidze M, Alimbarashvili E, Vishnepolsky B, Gabrielian A, Rosenthal A, Hurt DE, Tartakovsky M. 2021. DBAASP v3: database of antimicrobial/cytotoxic activity and structure of peptides as a resource for development of new therapeutics. *Nucleic Acids Research* 49:D288-D297.
9. Waghu FH, Barai RS, Gurung P, Idicula-Thomas S. 2016. CAMPR3: a database on sequences, structures and signatures of antimicrobial peptides. *Nucleic Acids Research* 44:D1094-D1097.
10. Qureshi A, Thakur N, Tandon H, Kumar M. 2014. AVPdb: a database of experimentally validated antiviral peptides targeting medically important viruses. *Nucleic acids research* 42:D1147-D1153.



11. Boeckmann B, Bairoch A, Apweiler R, Blatter M-C, Estreicher A, Gasteiger E, Martin MJ, Michoud K, O'Donovan C, Phan I. 2003. The SWISS-PROT protein knowledgebase and its supplement TrEMBL in 2003. *Nucleic acids research* 31:365-370.
